# Supplementary material for: Genome-guided Discovery of the First Myxobacterial Biarylitide Myxarylin Reveals Distinct C–N Biaryl Crosslinking in RiPP Biosynthesis
Source: Preprints.org preprint supplement (doi:10.20944/preprints202111.0467.v1), 2021-11-25
Supplement: Supplementary file 3 [file supplementary]

**Supporting Information**

**Genome-guided discovery of the first myxobacterial Biarylitide Myxarylin reveals C–N biaryl crosslinking in RiPP biosynthesis**

Joachim J. Hug 1,2,†, Nicolas A. Frank 1,2,†, Christine Walt 1,2, Petra Šenica 1,2, Fabian Panter 1,2,3 and Rolf Müller 1,2,3,*

1 Helmholtz-Institute for Pharmaceutical Research Saarland (HIPS), Helmholtz Centre for Infection Research (HZI), Saarland University, Campus E8 1, 66123 Saarbrücken, Germany;
Joachim.Hug@helmholtz-hips.de (J.J.H.); Nicolas.Frank@helmholtz-hips.de (N.A.F.); Christine.Walt@helmholtz-hips.de (C.W.); Petra.Senica1@gmail.com (P.S.); Fabian.Panter@gmail.com (F.P.)

2 German Center for Infection Research (DZIF), Partner Site Hannover-Braunschweig, Germany

3 Helmholtz International Labs, Campus E8 1, 66123 Saarbrücken, Germany

* Correspondence: rolf.mueller@helmholtz-hips.de

† These authors contributed equally to this work.

Table of Contents

[1 Myxobacterial culture media 3](#_Toc87979251)

[2 Molecular cloning, construction of expression plasmids and genetic investigation 6](#_Toc87979252)

[2.1 Genetic investigations 7](#_Toc87979253)

[2.2 Heterologous production of Myxarylin in *M. xanthus* DK1622 8](#_Toc87979254)

[3 Compound Characterization 10](#_Toc87979255)

[3.1 Tandem MS spectra 10](#_Toc87979256)

[3.2 Structure elucidation 11](#_Toc87979257)

[3.2.1 NMR-based structure elucidation 11](#_Toc87979258)

[3.2.2 NMR spectra employed in Myxarylin structure elucidation 14](#_Toc87979259)

[3.2.3 Elucidation of the absolute stereochemistry 27](#_Toc87979260)

[4 References 33](#_Toc87979261)

# Myxobacterial culture media

**Table S1**. Recipe for VY/2 medium.

| **VY/2 – Medium** | | | |
| --- | --- | --- | --- |
| Amount | Ingredient | Concentration | Supplier |
| 5 g/L | Yeast (entire cells) | - | Deutsche Hefewerke GmbH, Nürnberg, Germany |
| 5 g/L | Soluble Starch | - | Carl Roth GmbH, Karlsruhe, Germany |
| 1 g/L | CaCl2• 2H2O | - | Sigma Aldrich Chemie GmbH, Taufkirchen, Germany |
| 1 g/L | MgSO4 • 7H2O | - | Grüssing GmbH, Filsum, Germany |
| 10 mL/L | TRIS • HCl pH 8 | 1 M | Sigma Aldrich Chemie GmbH, Taufkirchen, Germany |
| 100 µL/L | Sterile Vit. B12 solution  (added after autoclaving) | 1 mg/mL | Carl Roth GmbH, Karlsruhe, Germany |
| 200 µL/L | Sterile FeNaEDTA solution  (added after autoclaving) | 8 mg/mL | Sigma Aldrich Chemie GmbH, Taufkirchen, Germany |
| Dissolved in milli-Q. Water, pH adjusted to 7.2 with 1N HCl | | | |

**Table S2**. Recipe for VY medium.

| **VY – Medium** | | | |
| --- | --- | --- | --- |
| Amount | Ingredient | Concentration | Supplier |
| 10 g/L | Yeast (entire cells) | - | Deutsche Hefewerke GmbH, Nürnberg, Germany |
| 5 g/L | Soluble Starch | - | Carl Roth GmbH, Karlsruhe, Germany |
| 1 g/L | CaCl2• 2H2O | - | Sigma Aldrich Chemie GmbH, Taufkirchen, Germany |
| 1 g/L | MgSO4 • 7H2O | - | Grüssing GmbH, Filsum, Germany |
| 10 mL/L | TRIS • HCl pH 8 | 1 M | Sigma Aldrich Chemie GmbH, Taufkirchen, Germany |
| 100 µL/L | Sterile Vit. B12 solution  (added after autoclaving) | 1 mg/mL | Carl Roth GmbH, Karlsruhe, Germany |
| 200 µL/L | Sterile FeNaEDTA solution  (added after autoclaving) | 8 mg/mL | Sigma Aldrich Chemie GmbH, Taufkirchen, Germany |
| Dissolved in milli-Q. Water, pH adjusted to 7.2 with 1N HCl | | | |

**Table S3**. Recipe for CFL medium.

| **CFL – Medium** | | | |
| --- | --- | --- | --- |
| Amount | Ingredient | Concentration | Supplier |
| 3 g/L | Tryptone | - | Becton, Dickinson and Company, Sparks, MD, USA |
| 1 g/L | Soytone | - | Becton, Dickinson and Company, Sparks, MD, USA |
| 3.5 g/L | Soluble Starch | - | Carl Roth GmbH, Karlsruhe, Germany |
| 4 g/L | Maltose Monohydrate | - | Sigma Aldrich Chemie GmbH, Taufkirchen, Germany |
| 2 g/L | Glucose | - | Carl Roth GmbH, Karlsruhe, Germany |
| 0.5 g/L | CaCl2• 2H2O | - | Sigma Aldrich Chemie GmbH, Taufkirchen, Germany |
| 1 g/L | MgSO4 • 7H2O | - | Grüssing GmbH, Filsum, Germany |
| 10 mL/L | TRIS • HCl pH 8 | 1 M | Sigma Aldrich Chemie GmbH, Taufkirchen, Germany |
| 100 µL/L | Sterile Vit. B12 solution  (added after autoclaving) | 1 mg/mL | Carl Roth GmbH, Karlsruhe, Germany |
| 200 µL/L | Sterile FeNaEDTA solution  (added after autoclaving) | 8 mg/mL | Sigma Aldrich Chemie GmbH, Taufkirchen, Germany |
| Dissolved in milli-Q. Water, pH adjusted to 7.5 with 1N KOH | | | |

**Table S4**. Recipe for P medium.

| **P – Medium** | | | |
| --- | --- | --- | --- |
| Amount | Ingredient | Concentration | Supplier |
| 2 g/L | Peptone (Phytone) | - | Becton, Dickinson and Company, Sparks, MD, USA |
| 4 g/L | Probion FM582 | - | Hoechst GmbH, Frankfurt, Germany |
| 8 g/L | Soluble Starch | - | Carl Roth GmbH, Karlsruhe, Germany |
| 2 g/L | Glucose | - | Carl Roth GmbH, Karlsruhe, Germany |
| 1 g/L | CaCl2• 2H2O | - | Sigma Aldrich Chemie GmbH, Taufkirchen, Germany |
| 1 g/L | MgSO4 • 7H2O | - | Grüssing GmbH, Filsum, Germany |
| 10 mL/L | TRIS • HCl pH 8 | 1 M | Sigma Aldrich Chemie GmbH, Taufkirchen, Germany |
| 100 µL/L | Sterile Vit. B12 solution  (added after autoclaving) | 1 mg/mL | Carl Roth GmbH, Karlsruhe, Germany |
| 200 µL/L | Sterile FeNaEDTA solution  (added after autoclaving) | 8 mg/mL | Sigma Aldrich Chemie GmbH, Taufkirchen, Germany |
| Dissolved in milli-Q. Water, pH adjusted to 7.5 with 1N KOH | | | |

**Table S5**. Recipe for M medium.

| **M – Medium** | | | |
| --- | --- | --- | --- |
| Amount | Ingredient | Concentration | Supplier |
| 10 g/L | Soy Peptone | - | Becton, Dickinson and Company, Sparks, MD, USA |
| 10 g/L | Maltose monohydrate | - | Becton, Dickinson and Company, Sparks, MD, USA |
| 1 g/L | CaCl2• 2H2O | - | Sigma Aldrich Chemie GmbH, Taufkirchen, Germany |
| 1 g/L | MgSO4 • 7H2O | - | Grüssing GmbH, Filsum, Germany |
| 10 mL/L | TRIS • HCl pH 8 | 1 M | Sigma Aldrich Chemie GmbH, Taufkirchen, Germany |
| 100 µL/L | Sterile Vit. B12 solution  (added after autoclaving) | 1 mg/mL | Carl Roth GmbH, Karlsruhe, Germany |
| 200 µL/L | Sterile FeNaEDTA solution  (added after autoclaving) | 8 mg/mL | Sigma Aldrich Chemie GmbH, Taufkirchen, Germany |
| Dissolved in milli-Q. Water, pH adjusted to 7.5 with 1N KOH | | | |

**Table S6**. Recipe for YM medium.

| **YM – Medium** | | | |
| --- | --- | --- | --- |
| Amount | Ingredient | Concentration | Supplier |
| 3 g/L | Yeast extract | - | Becton, Dickinson and Company, Sparks, MD, USA |
| 3 g/L | Malt extract | - | Becton, Dickinson and Company, Sparks, MD, USA |
| 5 g/L | Peptone (Phytone) | - | Becton, Dickinson and Company, Sparks, MD, USA |
| 10 g/L | Glucose | - | Carl Roth GmbH, Karlsruhe, Germany |
| 1 mL/L | KxHyPO4 buffer pH 8.0 | 0.8 M | Sigma Aldrich Chemie GmbH, Taufkirchen, Germany |
| 1 g/L | MgSO4 • 7H2O | - | Grüssing GmbH, Filsum, Germany |
| 10 mL/L | TRIS • HCl pH 8 | 1 M | Sigma Aldrich Chemie GmbH, Taufkirchen, Germany |
| 100 µL/L | Sterile Vit. B12 solution  (added after autoclaving) | 1 mg/mL | Carl Roth GmbH, Karlsruhe, Germany |
| 200 µL/L | Sterile FeNaEDTA solution  (added after autoclaving) | 8 mg/mL | Sigma Aldrich Chemie GmbH, Taufkirchen, Germany |
| Dissolved in milli-Q. Water, pH adjusted to 7.5 with 1N KOH | | | |

**Table S7**. Recipe for CTT medium.

| **CTT – Medium** | | | |
| --- | --- | --- | --- |
| Amount | Ingredient | Concentration | Supplier |
| 10 g/L | Casitone | - | Becton, Dickinson and Company, Sparks, MD, USA |
| 10 mL/L | MgSO4 • 7H2O | 0.8 M | Grüssing GmbH, Filsum, Germany |
| 1 mL/L | KxHyPO4 buffer pH 8.0 | 0.1 M | Sigma Aldrich Chemie GmbH, Taufkirchen, Germany |
| 10 mL/L | TRIS • HCl ph8 | 1 M | Sigma Aldrich Chemie GmbH, Taufkirchen, Germany |
| 100 µL/L | Sterile Vit. B12 solution  (added after autoclaving) | 1 mg/mL | Carl Roth GmbH, Karlsruhe, Germany |
| 200 µL/L | Sterile FeNaEDTA solution  (added after autoclaving) | 8 mg/mL | Sigma Aldrich Chemie GmbH, Taufkirchen, Germany |
| Dissolved in milli-Q. Water, pH adjusted to 7.6 with 1N KOH | | | |

**Table S8**. Recipe for AMB medium.

| AMB– Medium | | | |
| --- | --- | --- | --- |
| Amount | Ingredient | Concentration | Supplier |
| 2.5 g/L | Casitone | - | Becton, Dickinson and Company, Sparks, MD, USA |
| 5 g/L | Soluble starch | - | Carl Roth GmbH, Karlsruhe, Germany |
| 10 mL/L | MgSO4 • 7H2O | 0.8 M | Grüssing GmbH, Filsum, Germany |
| 1 mL/L | KxHyPO4 buffer pH 8.0 | 0.1 M | Sigma Aldrich Chemie GmbH, Taufkirchen, Germany |
| 10 mL/L | TRIS • HCl pH 8.0 | 1 M | Sigma Aldrich Chemie GmbH, Taufkirchen, Germany |
| 100 µL/L | Sterile Vit. B12 solution  (added after autoclaving) | 1 mg/mL | Carl Roth GmbH, Karlsruhe, Germany |
| 200 µL/L | Sterile FeNaEDTA solution  (added after autoclaving) | 8 mg/mL | Sigma Aldrich Chemie GmbH, Taufkirchen, Germany |
| Dissolved in milli-Q. Water, pH adjusted to 7.6 with 1N KOH | | | |

# Molecular cloning, construction of expression plasmids and genetic investigation

**Table S9**. List of oligonucleotides used in this study.

| No. | Primer name | Primer sequence 5’–3’ |
| --- | --- | --- |
| 1 | Fw_mx8_PagI | ATAT**TCATGA**GGCCATCGTCGAAAGAGTCG |
| 2 | Rv_mx8_ScaI | ATAT**AGTACT**AGGACTCCTCTGGCTGGGTG |
| 3 | Fw_An_d48_NdeI | ATAT**CATATG**AACTACCTGCACTGAGAGGAGCCTCCGTGCCCA |
| 4 | Rv_An_d48_EcoRI | TATAT**GAATTC**GAGGCGGCGTAGCCCTCA |
| 5 | Mx8-attP-up2 | CGACGGTGCCGACAAATAC |
| 6 | Mx8-attB-up2 | GCGCACTGGACCATCACGTC |
| 7 | Mx8-attP-down | GGCTTGTGCCAGTCAACTGCG |
| 8 | Mx8-attB-down | CGGATAGCTCAGCGGTAGAG |

Restriction sites in bold, *bytA* and *bytO* start are underlined, RBS of *bytO* in yellow.

**Table S10**. List of oligonucleotides for sequencing used in this study.

| No. | Primer name | Primer sequence 5’–3’ |
| --- | --- | --- |
| 1 | Pvan_Seq1 | TGTCAAGCTGCTGTTTTCGC |
| 2 | M13-29R | CAGGAAACAGCTATGACC |
| 3 | BiarylSeq1 | GAGGCGGCGTAGCCCTCA |
| 4 | BiarylSeq2 | GAGGAGCCTCCGTGCCCA |

**Table S11**. List of PCR-amplified constructs*.*

| No. | PCR product name/characteristics | Size [bp] | template | Primers used |
| --- | --- | --- | --- | --- |
| 1 | mx8_integrase gene_PagI_ScaI | 1945 | pBen39 | primer No.1  primer No.2 |
| 2 | An_d48_*bytAOZ* | 2034 | gDNA from *P. fallax* An d48 | primer No.1  primer No.2 |

**Table S12**. List of plasmids used in this study.

| No. | Plasmid name/ characteristic | Size [kb] | Function | Reference |
| --- | --- | --- | --- | --- |
| 1 | pFPVan_*pcyA* | 6.181 | pCR 2.1 TOPO derivative; used as backbone for heterologous expression of bytAO | [1] |
| 2 | pBen39 | 7.616 | mx8_integrase fragment mobilized on pUC-based plasmid pBen38/*kanR, ampR* | unpublished |

**Table S13**. List of genetic constructs generated in this study.

| No. | Plasmid name | Construction details/ characteristics |
| --- | --- | --- |
| 1 | pFPVan_*pcyA_mx8* | Construct obtained by conventional restriction ligation of plasmid pFPVan_*pcyA* and PCR product No. 1 |
| 2 | pFPVan_*bytAOZ_mx8* | Construct obtained by conventional restriction ligation of construct No. 1 and PCR product No. 2 |

## Genetic investigations


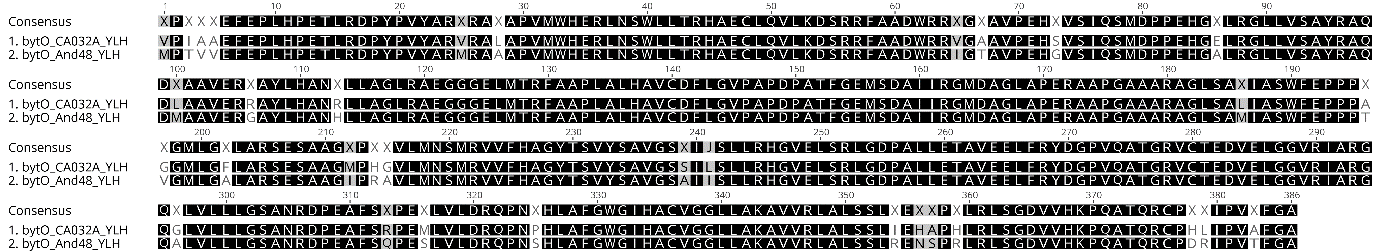


**Figure S1**. Amino acid alignment of myxobacterial BytO homologs from *Pyxidicoccus* sp. CA032A (*bytO*_CA032A_YLH) and *Pyxidicoccus* fallax An d48 (*bytO*_And48_YLH). Pairwise identity and identical sites: 91.5%.


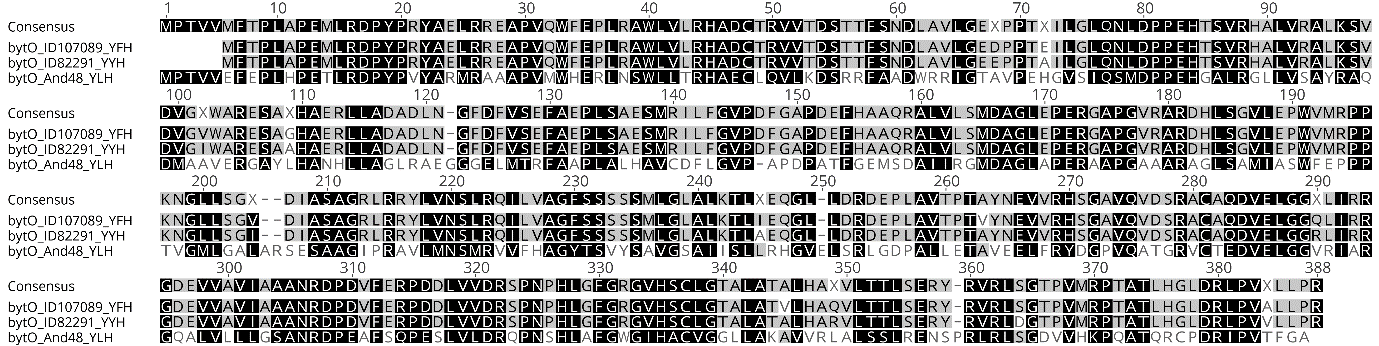


**Figure S2**. Amino acid alignment of BytO homologs from *Planomonospora* sp. ID107089 (*bytO*_ ID107089_YFH), *Planomonospora* sp. ID82291 (*bytO*_ID82291_YYH) and *Pyxidicoccus* fallax An d48 (*bytO*_And48_YLH). Pairwise identity: 59.5%, Identical sites: 40.7%.


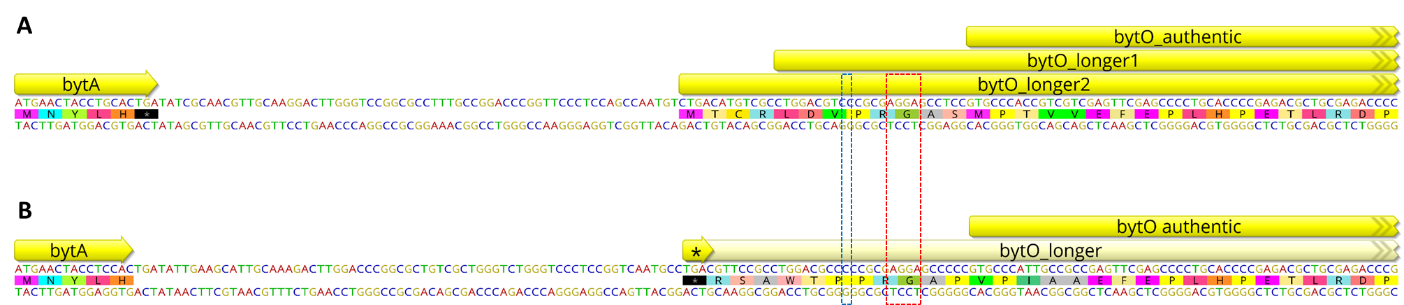


**Figure S3**. Nucleotide sequence and different orfs of *bytO* in *Pyxidicoccus fallax* An d48 (**A**) and *Pyxidicoccus* sp. CA032A (**B**) that are varying in nucleotide length. The length of a hypothetical *bytO* gene in *Pyxidicoccus* sp. CA032A is limited by the presence of a stop codon in the same translational frame. *Pyxidicoccus fallax* An d48 features in this genetic locus a single nucleotide deletion, which causes a frame shift (blue dashed box). Therefore two hypothetical longer orfs of *bytO* could be possibly expressed. Nevertheless, the most likely start of the myxobacterial *bytO* is in both nucleotide sequences labeled as *bytO* authentic for the following two reasons; firstly, a putative RBS (red dashed box) is only present in front of *bytO* authentic, and secondly in *Pyxidicoccus* sp. CA032A, only *bytO authentic* can be expressed, since any other longer version does not feature an appropriate start codon.

## Heterologous production of Myxarylin in *M. xanthus* DK1622

To express the identified Myxarylin-BGC in *M. xanthus* DK1622, an expression vector was constructed based on the plasmid pFPVan_*pcyA.*[1] To enable efficient genomic integration of the expression plasmid, the mx8 integrase gene originating from the bacteriophage Mx8 was PCR-amplified (Phusion™ High-Fidelity polymerase, Thermo Fisher Scientific) from pBen39 and the resulting PCR product subcloned into pFPVan_*pcyA* via conventional restriction ligation (PagI, ScaI). The resulting plasmid pFPVan_*pcyA_mx8* (genetic construct 1)was subsequently used to incorporate the PCR-amplified Myxarylin-BGC (An_d48_*bytAOZ,* PCR product 2) from *P. fallax* An d48, which led to the final expression vector pFPVan_*bytAOZ_mx8* (genetic construct 2). The PCR-amplified operon (An_d48_*bytAOZ,* PCR product 2) differs from the natural sequence in that sense, it lacks the intergenic region between *bytA* and *bytO* (termed bytAO_intergenic region, **Figure S3**).


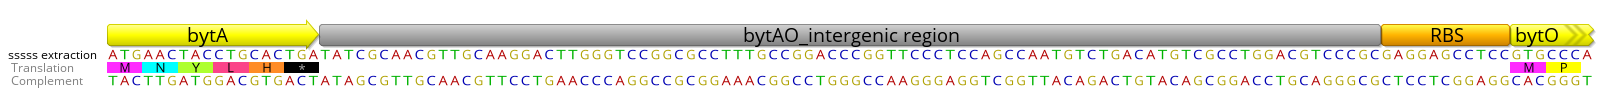


**Figure S4**. Nucleotide sequence encoding the precursor peptide BytA, the intergenic region termed bytAO, the putative ribosome binding site of *bytO*, and the first seven nucleotides encoding the cytochrome P450 dependent enzyme BytO.

Since the intergenic region *bytAO* features *in silico* the formation of secondary structures (**Figure S5**) –resembling those of known transcriptional terminators such as the *tD1* terminator from *M. xanthus* bacteriophage Mx8 [2] – the heterologous expression construct was designed in a way to omit this 90 bp intergenic region and only includes 11 bp in which a putative ribosome binding site is incorporated (..AGGA..) (**Figure S6**).


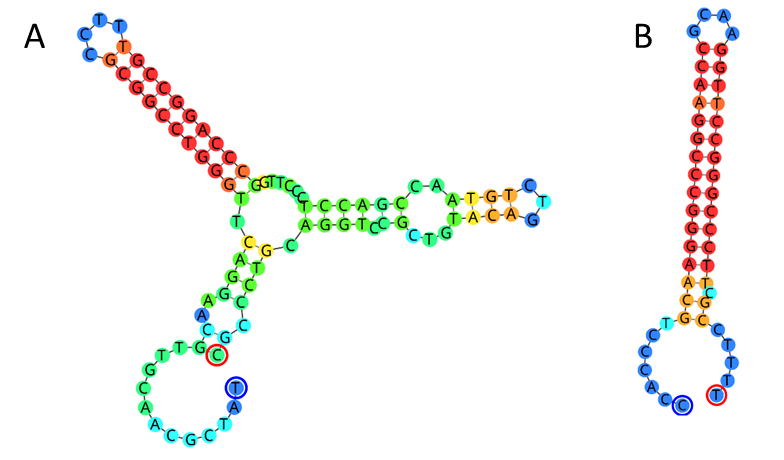


**Figure S5.** Predicted secondary structure of the 90 bp intergenic region *bytAO* (**A**), and the hair pin structure of the previously described 49 bp transcriptional terminator *tD1* (**B**).


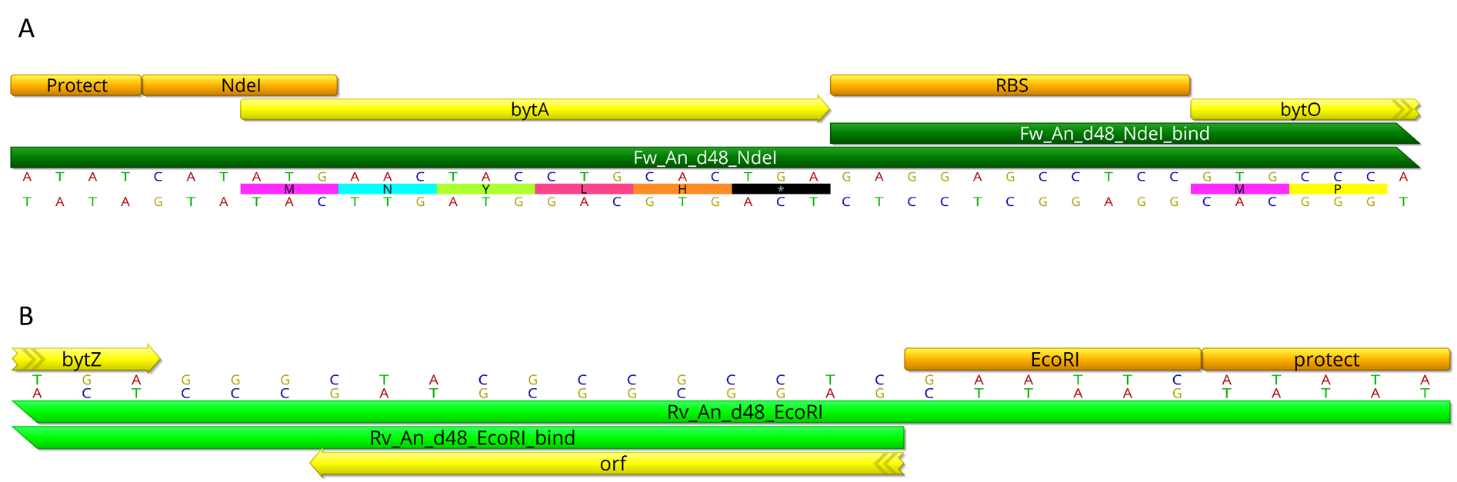


**Figure S6.** **A**) Nucleotide sequence and annotation of the primer Fw_An_d48_NdeI (Primer 3, 43 bp). Primer 3 comprises at the 5’ end extensions which include a protection site for the NdeI restricition site, the authentic *bytA* nucleotide sequence, the identified RBS site of *bytO* and the first seven nucleotides of the gene encoding BytO. Within Primer 3, 18 bp at the 3’ end is responsible for the site-specific annealing (termed Fw_An_d48_NdeI_bind). **B**) The associated reverse primer Rv_An_d48_EcoRI (Primer 4, 29 bp), was designed in a way that the genetic region downstream of *bytZ* remained unmodified in the respective PCR product. Hence, Primer 4 features at the 5’ end an extension for the EcoRI restriction site including a 5 bp protection site and 18 bp at the 3’ end for site-specific annealing (termed Rv_An_d48_EcoRI_bind).

# Compound Characterization

## Tandem MS spectra


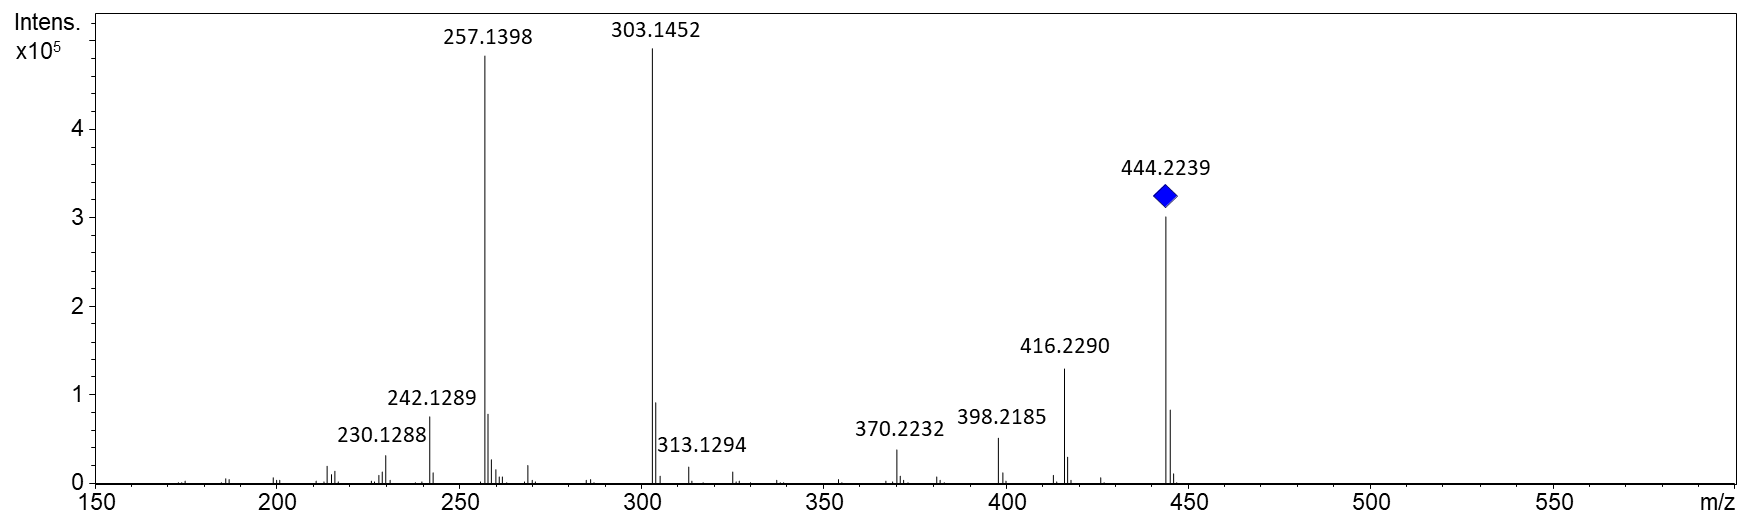


**Figure S7**. Tandem MS spectrum of **1** (collision energy: 35.0 eV). Leucine loss (Δ*m/z* = 113.0841) is visible *e.g.* between 416.2290 *m/z* and 303.1452 *m/z* (err. 0.0003 *m/z)* or 370.2232 *m/z* and 257.1398 *m/z* (err. 0.0007 *m/z*).


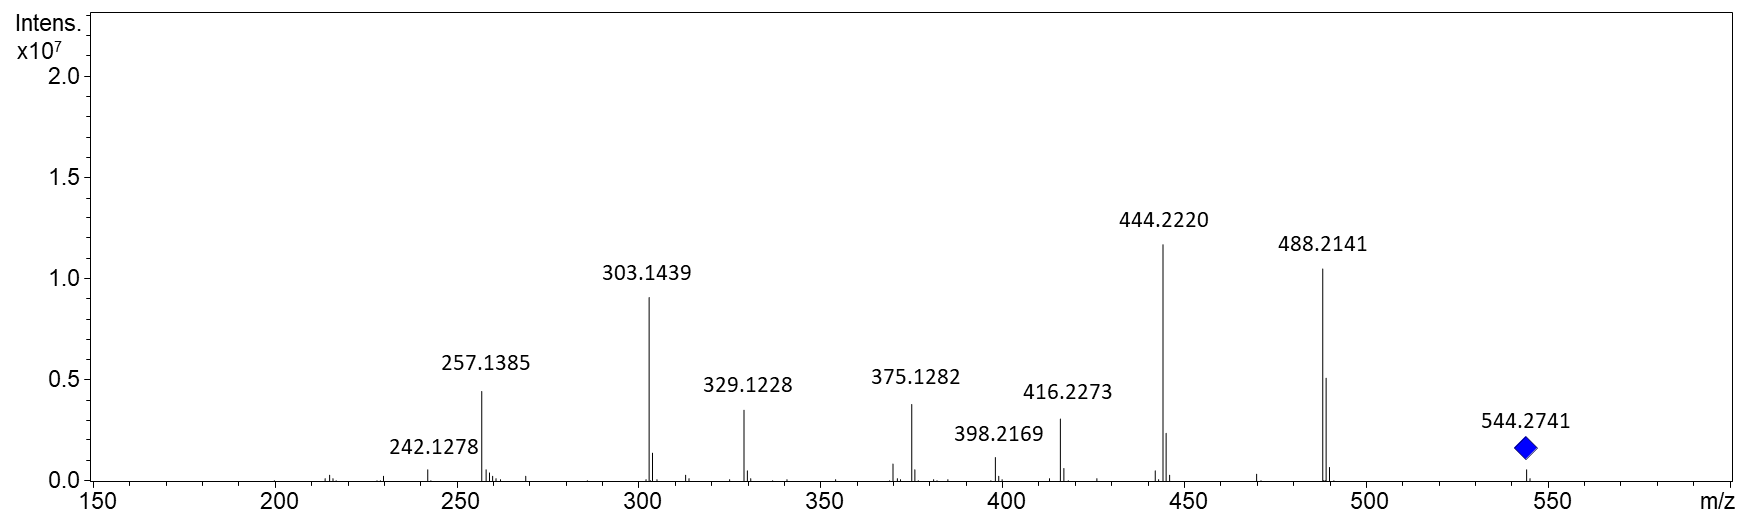


**Figure S8**. Tandem MS spectrum of **2** (collision energy: 35.9 eV).

## Structure elucidation

### NMR-based structure elucidation

**Table S14**. NMR spectroscopic data of **2** measured in methanol-d4 at 700/175 MHz.

| # | δ 13C [ppm] | δ 1H [ppm], mult (*J* [Hz]) | δ 15N [ppm] | COSY | HMBC | sel NOesy | 1H-15N HMBC |
| --- | --- | --- | --- | --- | --- | --- | --- |
| 1 | 171.8 | - | - | - | - | n.m. | - |
| 2 | 59.7 | 4.66, m | - | 3 | - | n.m. | - |
| 3 | 34.2 | 3.55,2.56, dd (15.19, 11.77) | - | 2,3,5 | 1,2,5,9 | n.m. | - |
| 4 | 131.1 | - | - | - | - | n.m. | - |
| 5 | 126.1 | 6.84, m | - | - | - | n.m. | - |
| 6 | - | - | - | - | - | n.m. | - |
| 7 | 149.7 | - | - | - | - | n.m. | - |
| 8 | 118.1 | 6.91, brs | - | 9 | 4,5,7,9 | 9 | - |
| 9 | 130.2 | 7.03, d (8.13) | - | 8 | 3,5,7,8 | n.m. | - |
| 10 | 157.6 | - | - | - | - | n.m. | - |
| 11 | 81.9 | - | - | - | - | n.m. | - |
| 12,13,14 | 28.8 | 1.48, s | - | - | 11,12,13,14- | n.m. | - |
| 15 | 30.7 | 2.90, s | - | - | 2,10 | n.m. | 16 |
| 1’ | 173.7 | - | - | - | - | n.m. | - |
| 2’ | 52.8 | 4.86, s | - | 3’ | 1,1’,3’,4’ | n.m. | - |
| 3’ | 43.7 | 1.58, m | - | 2’,5’,6’ | 4’ | n.m. | - |
| 4’ | 26.1 | 1.60, m | - | 5’,6’ | - | n.m. | - |
| 5’,6’ | 23.8 | 0.94, m | - | 3’ | - | n.m. | - |
| 1’’ | 177.8 | - | - | - | - | n.m. | - |
| 2’’ | 55.2 | 4.61, dd (12.62, 2.78) | - | 3’’ | 1’,1’’,3’’,4’’ | n.m. | - |
| 3’’ | 33.0 | 3.32,2.82, dd (16.47, 12.62) | - | 2’’,3’’,6’’ | 1’’,2’’,4’’,6’’ | n.m. | 18,20 |
| 4’’ | 139.3 | - | - | - | - | n.m. | - |
| 5’’ | 138.5 | 7.94, s | - | 6’’ | 4’’,6’’ | - | 19,20 |
| 6’’ | 118.9 | 6.89, s | - | 3’’,5’’ | 4’’,5’’ | - | 19,20 |
| 16 | - | - | 84.7 | - | - | n.m. | - |
| 17 | - | - | - | - | - | n.m. | - |
| 18 | - | - | 123.1 | - | - | n.m. | - |
| 19 | - | - | 174.6 | - | - | n.m. | - |
| 20 | - | - | 247.3 | - | - | n.m. | - |

n.m.: not measured

**Table S15**. NMR spectroscopic data of **1** measured in DMSO-d6 at 700/175 MHz.

| # | δ 13C [ppm] | δ 1H [ppm], mult (*J* [Hz]) | COSY | HMBC |
| --- | --- | --- | --- | --- |
| 1 | 166.6 | - | - | - |
| 2 | 61.1 | 4.08, m | 3,16 | - |
| 3 | 33.1 | 3.16, m | 2,5,9 | 1,2,5,9 |
| 4 | - | - | - | - |
| 5 | 127.8 | 6.81, d (2.25) | 3,9 | 3,7,9 |
| 6 | 125.3 | - | - | - |
| 7 | 149.3 | - | - | - |
| 8 | 117.1 | 7.08, d (8.34) | 9 | 6,7 |
| 9 | 131.8 | 7.23, dd (8.24,2.25) | 3,5,8 | 3,7,8 |
| 15 | 31.3 | 2.50, m | 16 | 2 |
| 1’ | 171.9 | - | - | - |
| 2’ | 51.5 | 4.71, td (9.06,5.4) | 3’,17 | - |
| 3’ | 42.1 | 1.54,1.48, m | 2’,4’ | 1’,2’,4’,5’,6’ |
| 4’ | 24.1 | 1.67, m | 5’,6’ | 3’,5’,6’ |
| 5’ | 22.7 | 0.93, d (6.63) | 4’ | 3’,4’,6’ |
| 6’ | 21.6 | 0.90 d (6.63) |  | 4’,5’ |
| 1’’ | 171.1 | - | - | - |
| 2’’ | 50.6 | 4.58, ddd (12.25, 9.52, 2.78) | 3’’,18 | - |
| 3’’ | 27.0 | 3.35,2.87, dd (15.19, 12.41) | 2’’,6’’ | 1’’,2’’,4’’,6’’ |
| 4’’ | 130.6 | - | - | - |
| 5’’ | 135.6 | 9.35, s | 6’’ | 4’’,6’’ |
| 6’’ | 120.4 | 7.16, s | 3’’,5’’ | 4’’,5’’ |
| 16 | - | 8.79, brs | 2 | - |
| 17 | - | 9.21, d (8.56) | 2’ | 1 |
| 18 | - | 8.86, d (9.52) | 2’’ | 1’ |

**Figure S9**. Chemical structure and atom numbering of **2**. COSY correlations are represented as bold lines, HMBC correlations are marked with arrows

**Figure S10**. Chemical structure and atom numbering of **1**. COSY correlations are represented as bold lines, HMBC correlations are marked with arrows

### NMR spectra employed in Myxarylin structure elucidation

**Figure S11**. 1H spectrum of **2** measured in methanol-d4 at 700 MHz.

**Figure S12**. 13C spectrum of **2** measured in methanol-d4 at 175 MHz.

**Figure S13**. HSQC spectrum of **2** measured in methanol-d4 at 700 (1H) and 175 (13C) MHz.

**Figure S14**. COSY spectrum of **2** measured in methanol-d4 at 700 MHz.

**Figure S15.** HMBC spectrum of **2** measured in methanol-d4 at 700 (1H) and 175 (13C) MHz.

**Figure S16**. 1H-15N HMBC spectrum of **2** measured in methanol-d4 at 700 (1H) and 175 (15N) MHz.

**Figure S17**. Spectrum of **2** exciting at δ(1H) = 6.91 ppm with a distance of 20.32 Hz in methanol-d4 at 700 MHz.

**Figure S18**. Selective 1D NOESY spectrum of **2** exciting at δ(1H) = 7.94 ppm with a distance of 17.20 Hz in methanol-d4 at 700 MHz.

**Figure 19.** 1H spectrum of **1** measured in DMSO-*d6* at 700 MHz.

**Figure 20.** 13C spectrum of **1** measured in DMSO-*d6* at 175 MHz.

**Figure 21.** HSQC spectrum of **1** measured in DSMO-*d6* at 700 (1H) and 175 (13C) MHz.

**Figure 22.** COSY spectrum of **1** measured in DMSO-*d6* at 700 MHz.

**Figure 23.** HMBC spectrum of **1** measured in DMSO-*d6* at 700 (1H) and 175 (13C) MHz.

### Elucidation of the absolute stereochemistry


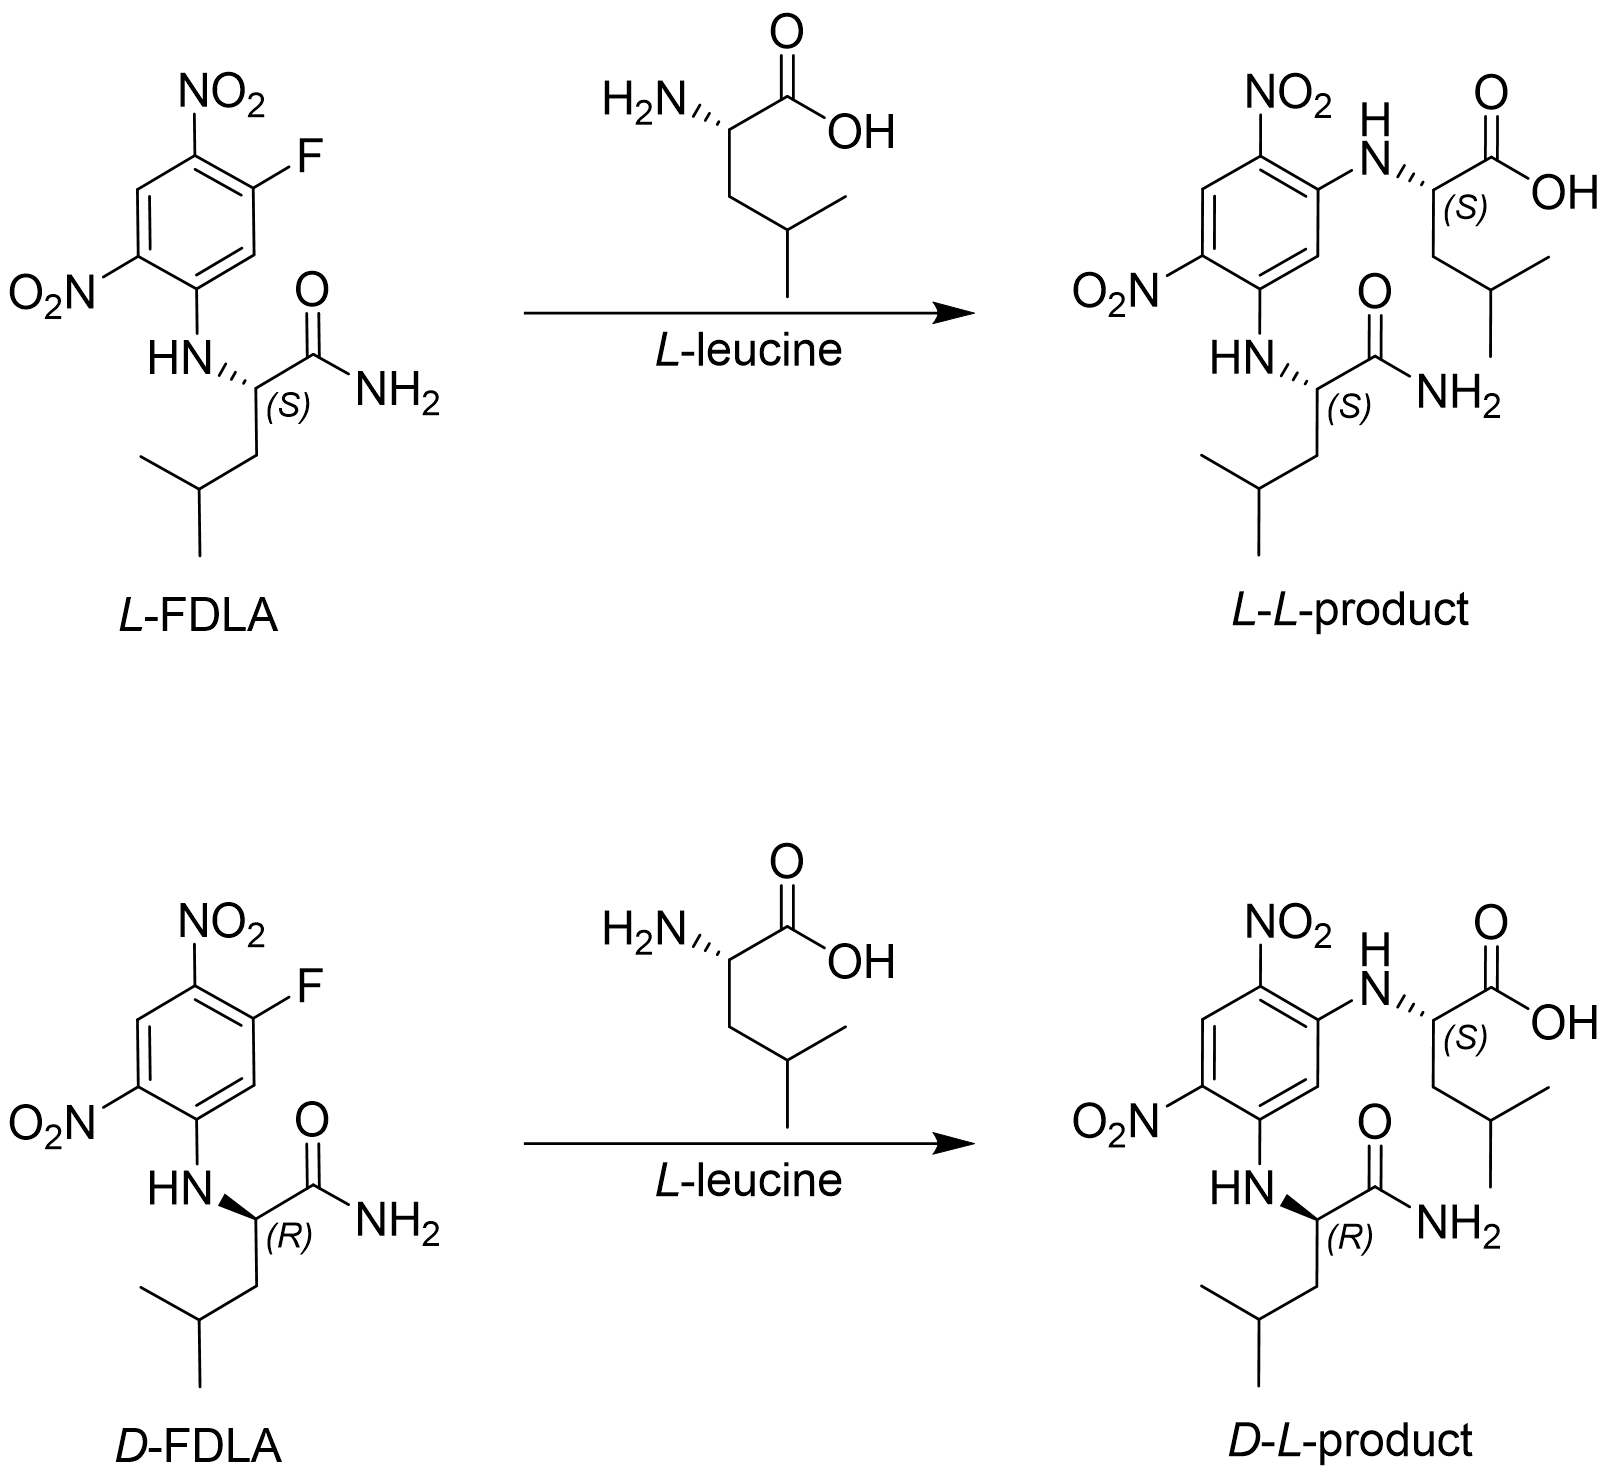


**Figure S24**. Marfey’s derivatization reaction of l-leucine standard with l- respective d-(1-fluoro-2,4-dinitrophenyl-5-leucine amide) (FDLA).


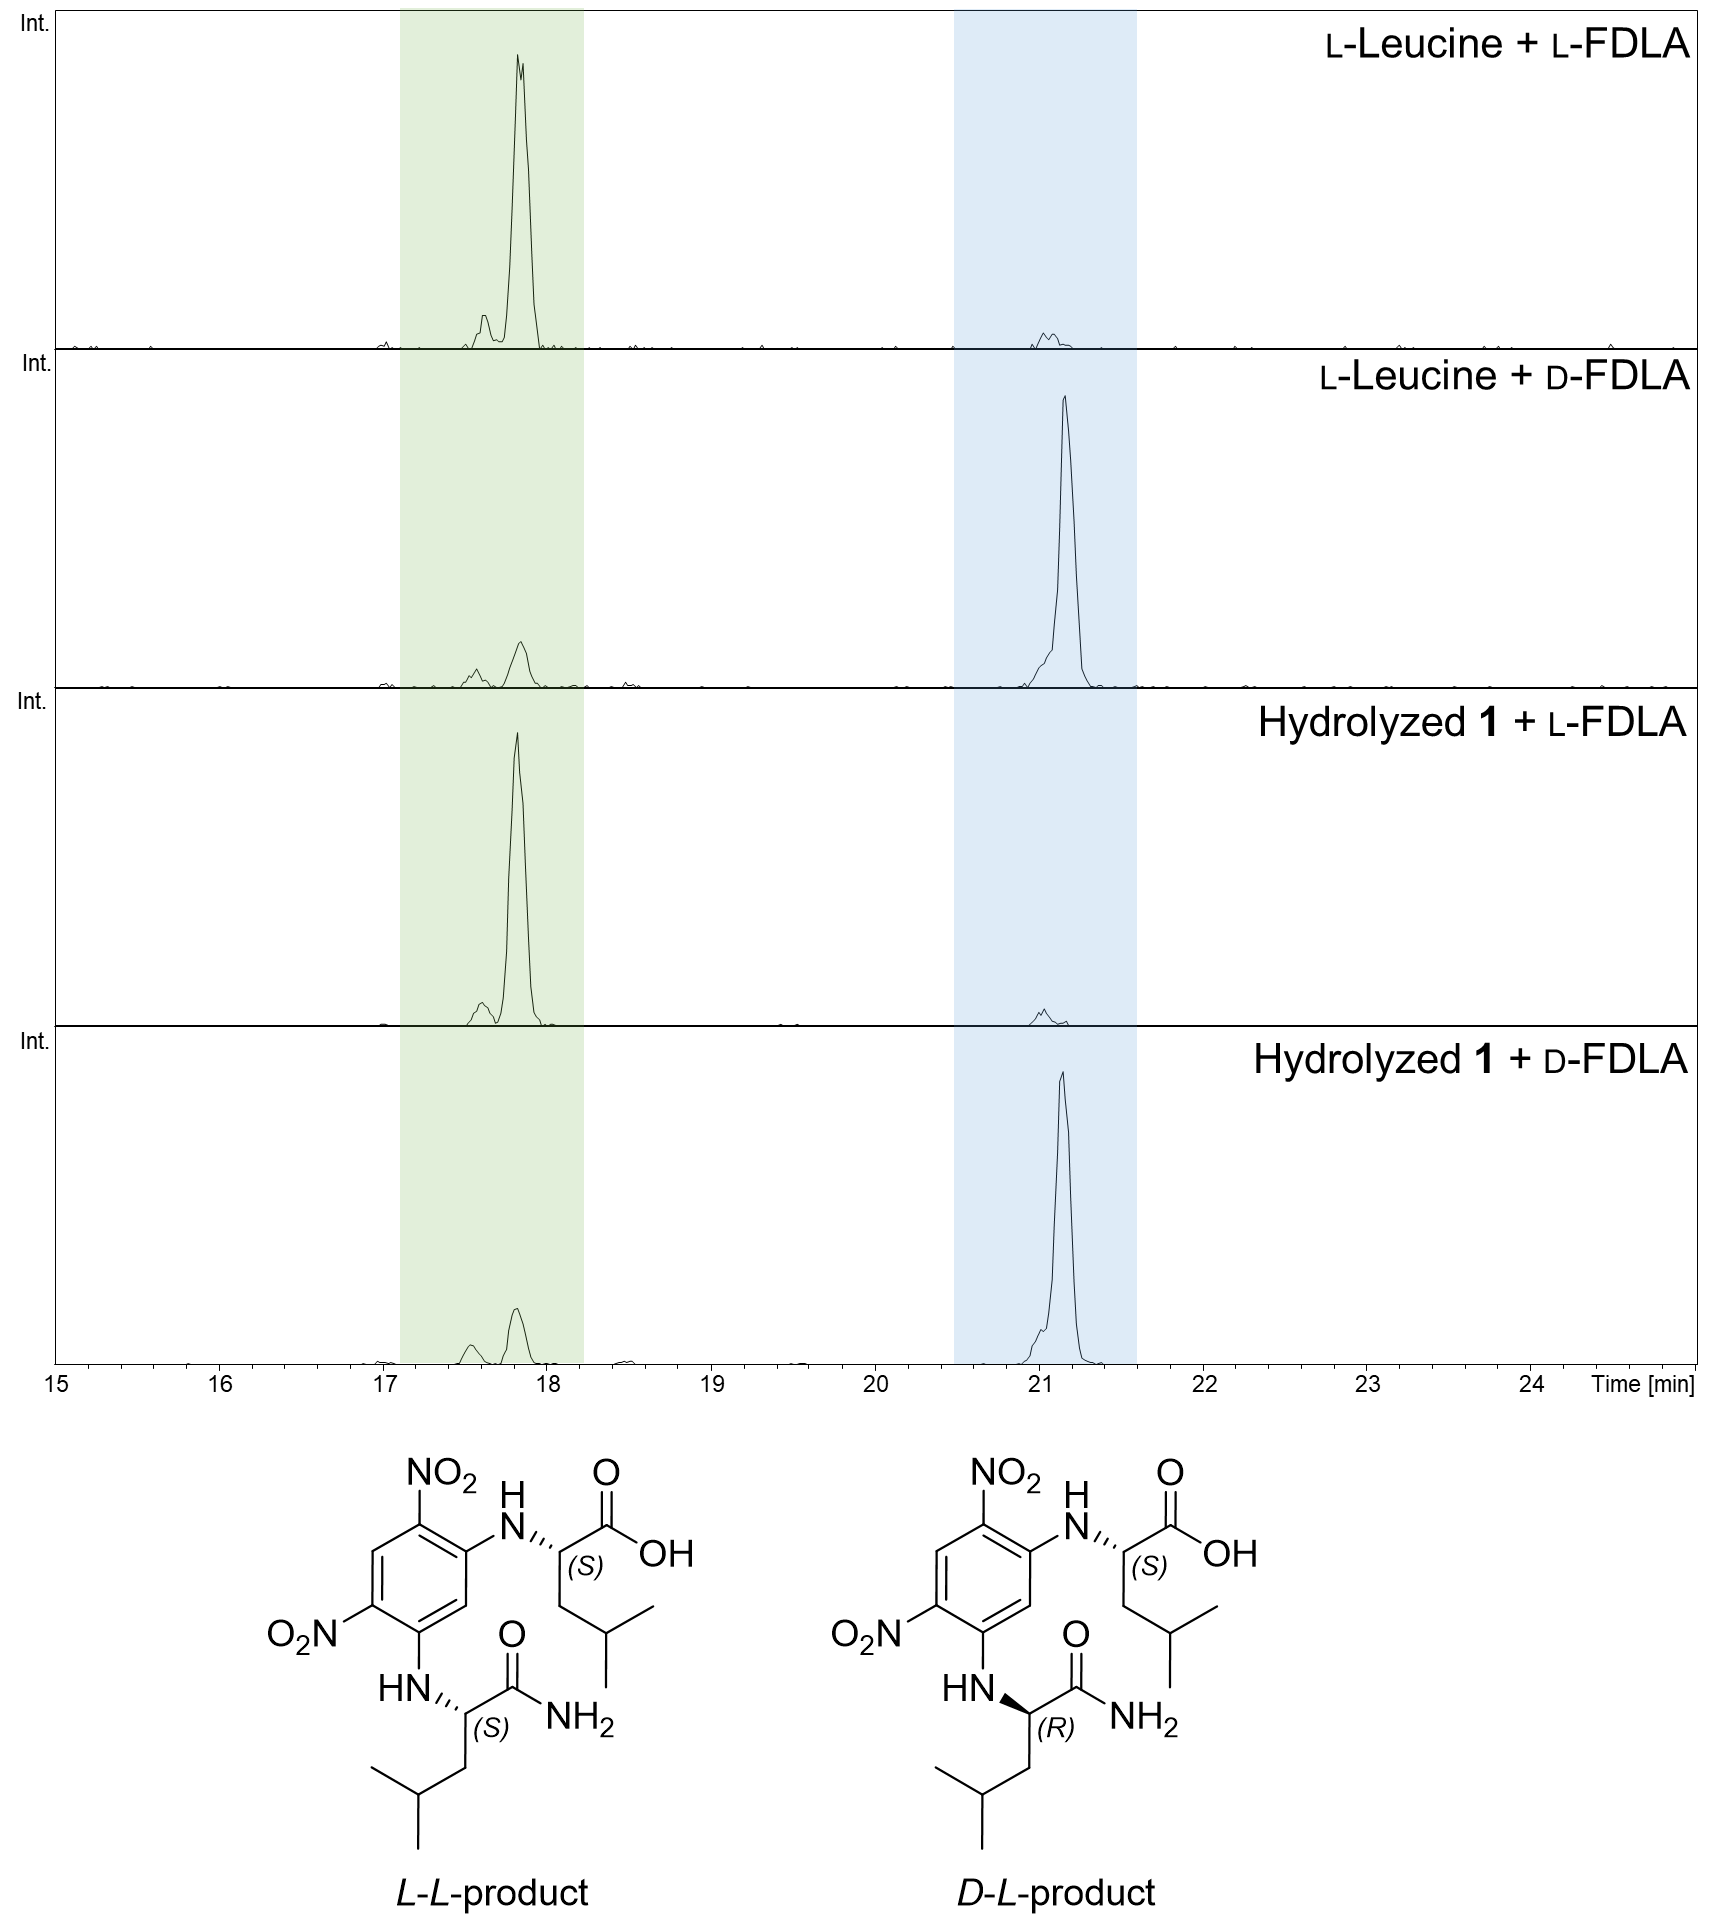


**Figure S25.** HPLC-MS extracted ion chromatograms (EICs) of 426.19833 *m/z* with a width of 0.005 *m/z* from Marfey’s derivatization reaction with commercial l-leucine standard and hydrolyzed **1**. Highlighted in green: l-l-product peaks; highlighted in blue: d-l-product peaks.


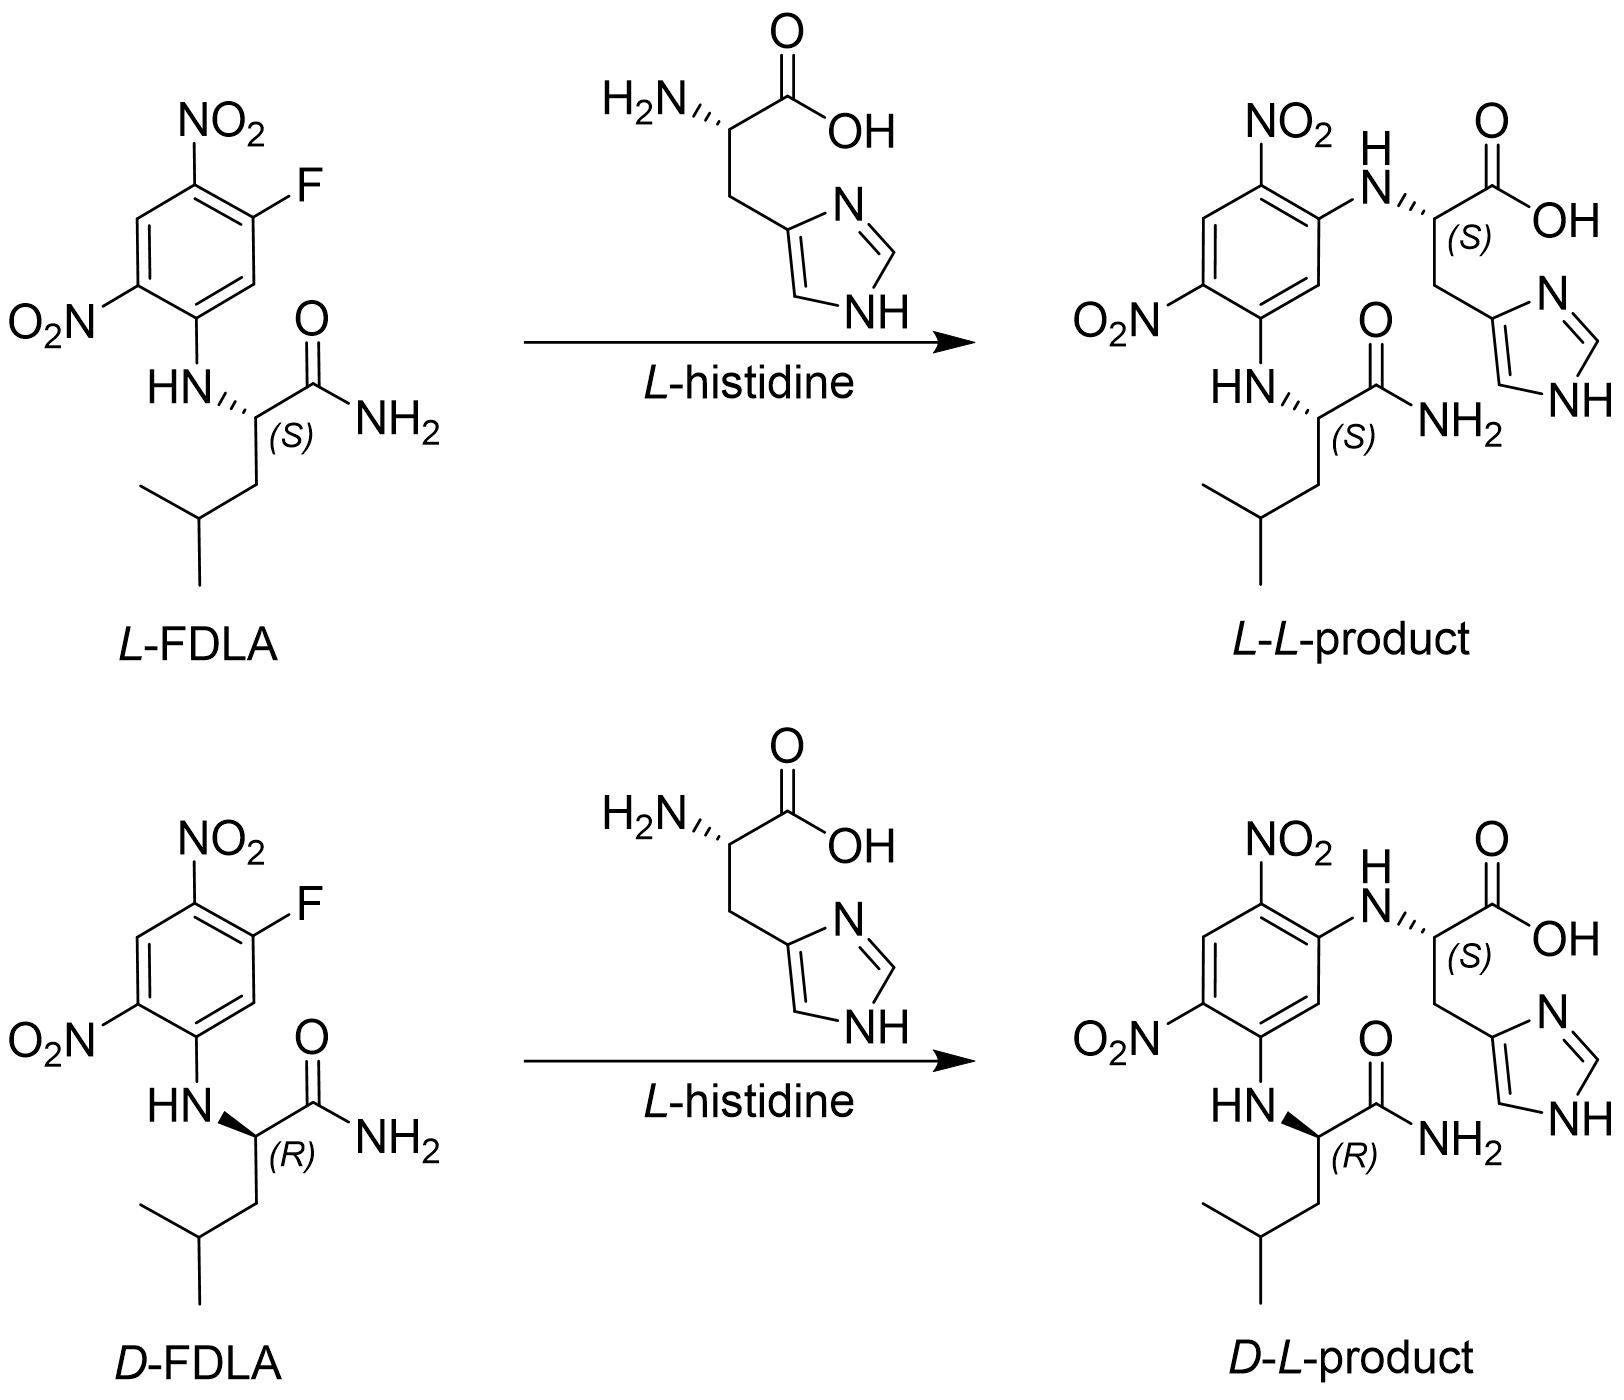


**Figure S26**. Marfey’s derivatization reaction of l-histidine standard with l- respective d-(1-fluoro-2,4-dinitrophenyl-5-leucine amide) (FDLA).


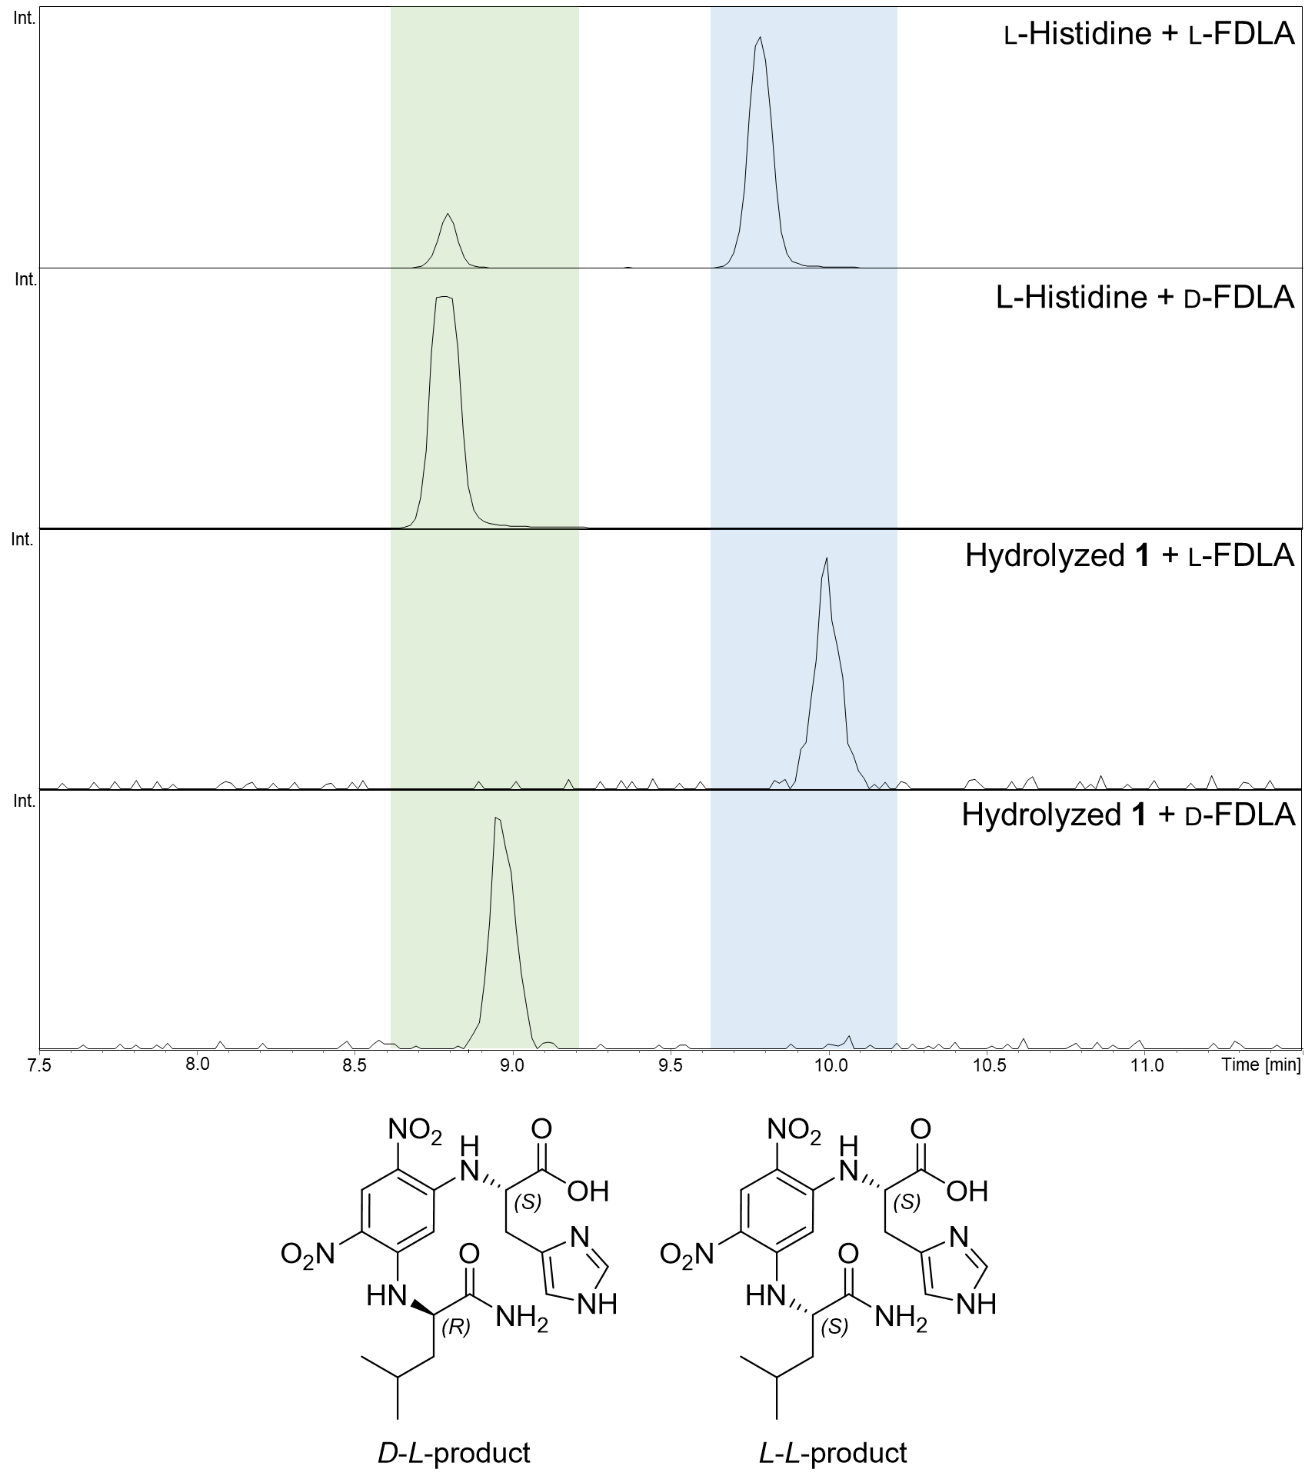
 **Figure S27.** HPLC-MS extracted ion chromatograms (EICs) of 450.17317 *m/z* with a width of 0.005 *m/z* from Marfey’s derivatization reaction with commercial l-histidine standard and hydrolyzed **1**. Highlighted in green: d-l-product peaks; highlighted in blue: l-l-product peaks.


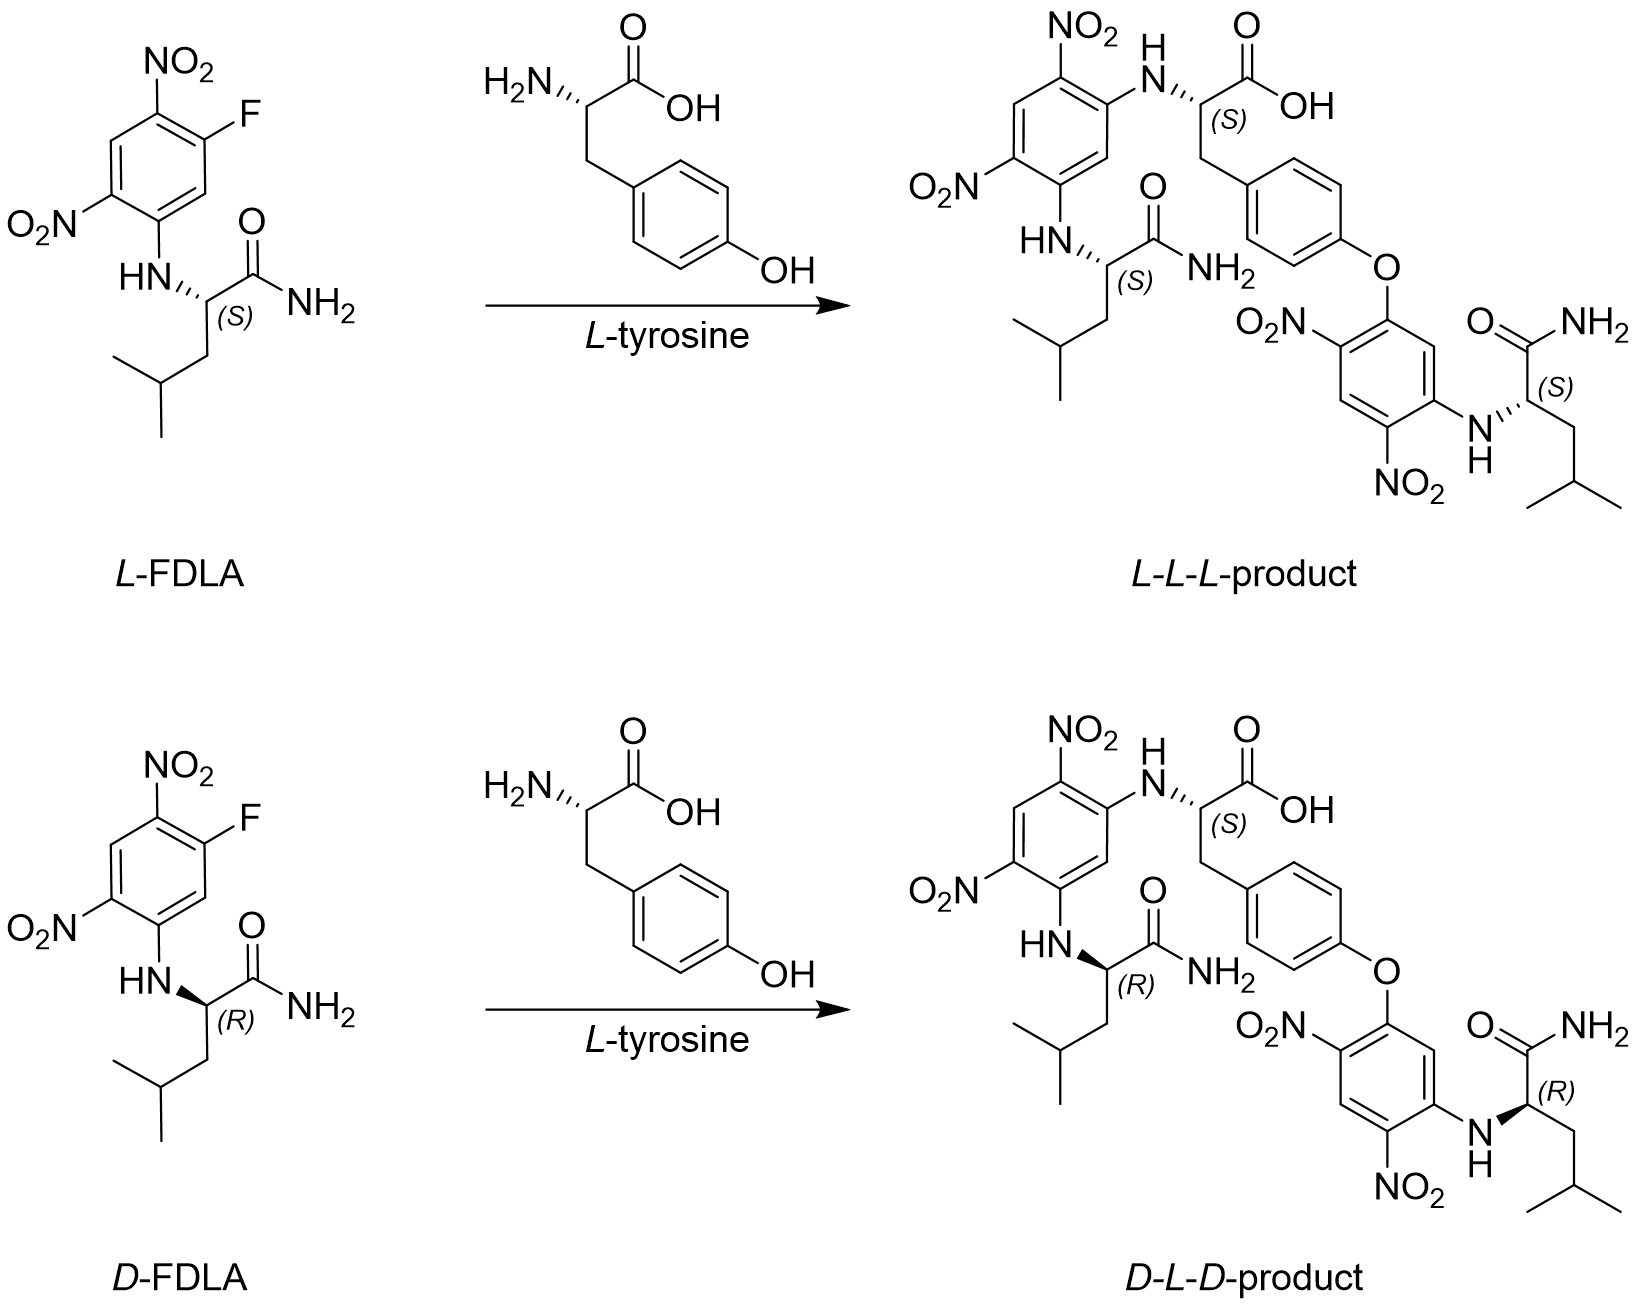


**Figure S28**. Marfey’s derivatization reaction of l-tyrosine standard with l- respective d-(1-fluoro-2,4-dinitrophenyl-5-leucine amide) (FDLA). In this case, we mainly observed the double derivatized product as shown above.


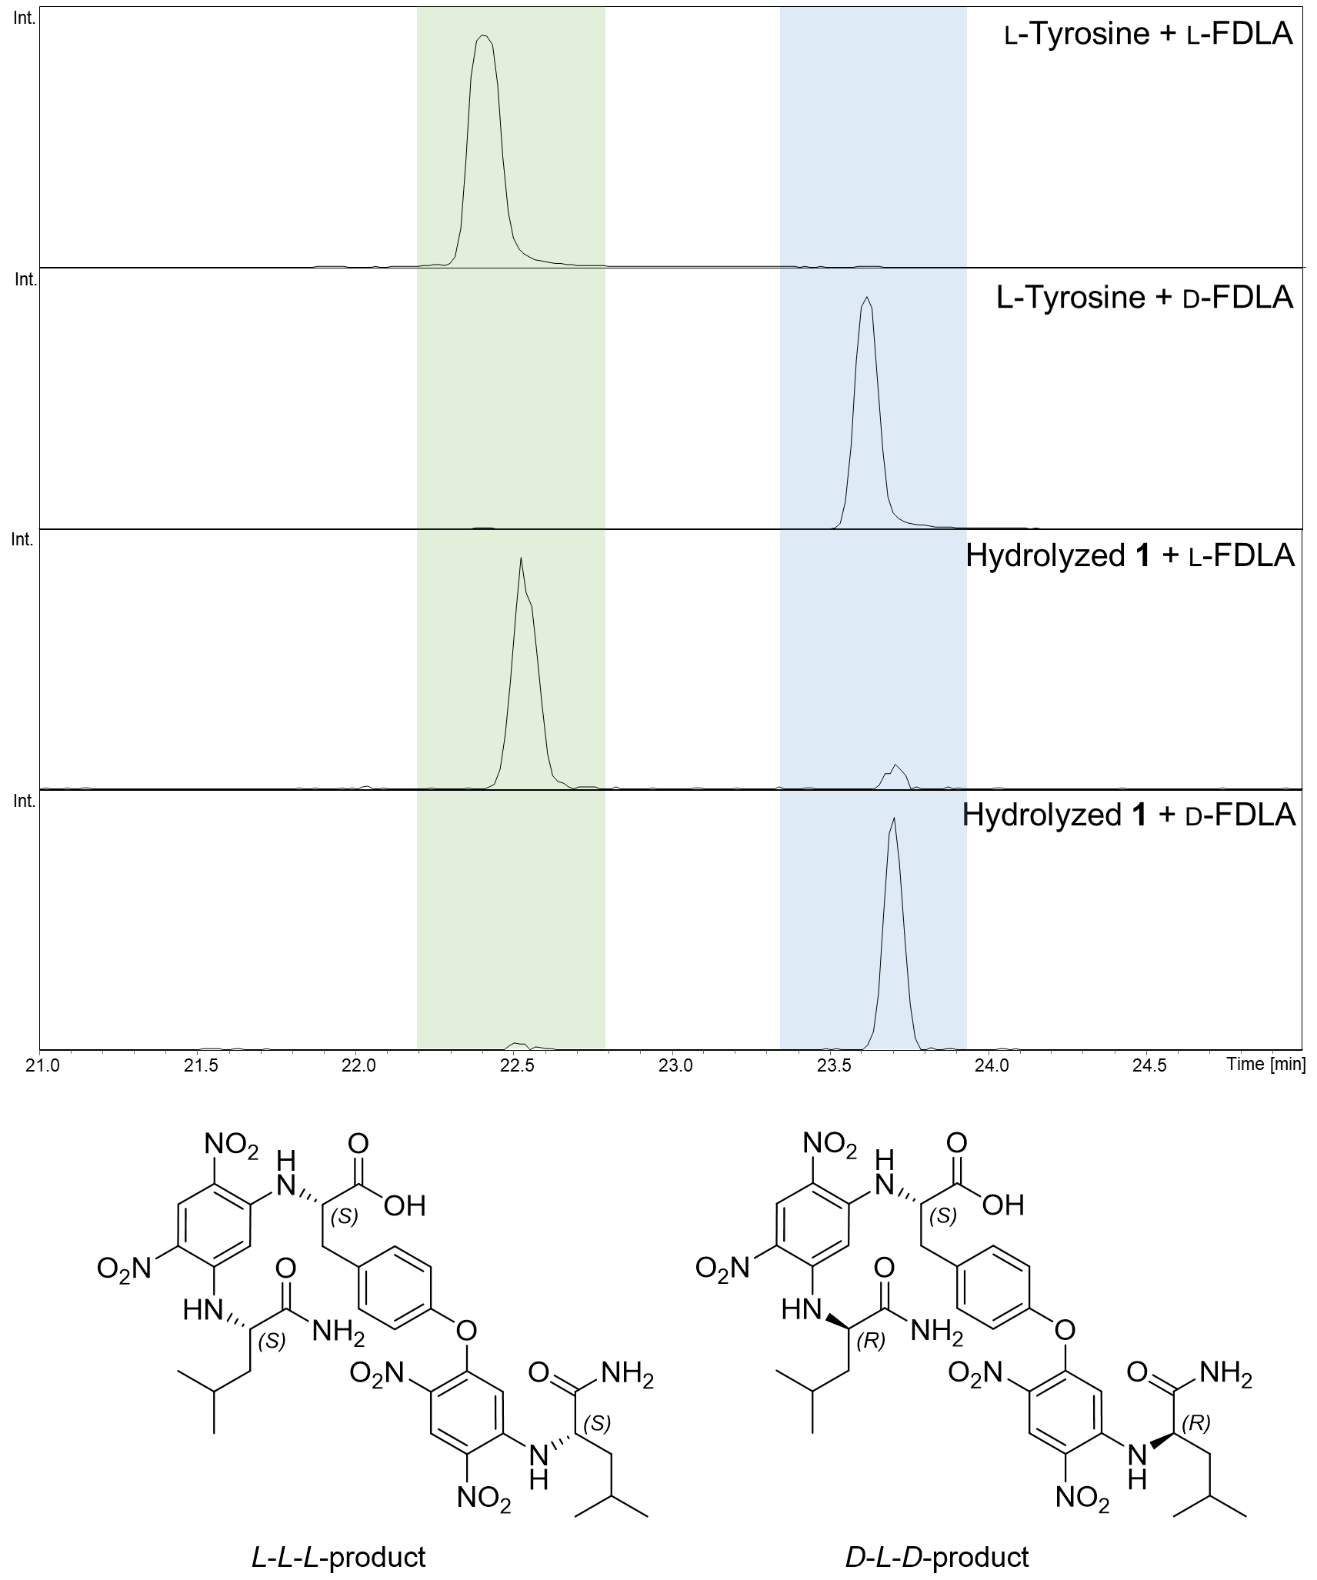


**Figure S29.** HPLC-MS extracted ion chromatograms (EICs) of 770.27401 *m/z* with a width of 0.005 *m/z* from Marfey’s derivatization reaction with commercial l-tyrosine standard and hydrolyzed **1**. Highlighted in green: l-l-l-product peaks; highlighted in blue: d-l-d-product peaks.

# References

1. Panter, F.; Krug, D.; Baumann, S.; Müller, R. Self-resistance guided genome mining uncovers new topoisomerase inhibitors from myxobacteria. *Chem. Sci.* **2018**, *9*, 4898–4908, doi:10.1039/C8SC01325J.

2. Magrini, V.; Creighton, C.; Youderian, P. Site-specific recombination of temperate Myxococcus xanthus phage Mx8: genetic elements required for integration. *J. Bacteriol.* **1999**, *181*, 4050–4061, doi:10.1128/jb.181.13.4050-4061.1999.
